# Supplementary material
Source: PubMed Central journal article supplement (PMC2822559)
Supplement: 00252.2009_2.pdf [file 00252.2009_2.pdf]

Supplemental Table #1

| Gene symbol     | Gene Description                                                | Taq Man Assay ID |
|-----------------|-----------------------------------------------------------------|------------------|
| 18S             | 18S                                                             | 4352930E         |
| <i>Actb</i>     | Beta Actin                                                      | 4352933E         |
| <i>Arbp</i>     | Acidic ribosomal phosphoprotein P0                              | Mm01974474_gH    |
| <i>Gapd</i>     | Glyceraldehyde 3phosphate dehydrogenase                         | 4352932E         |
| <i>Gusb</i>     | Glucuronidase, beta                                             | Mm00446953_m1    |
| <i>Atf4</i>     | Activating transcription factor 4                               | Mm00515324_m1    |
| <i>Cat</i>      | Catalase                                                        | Mm00437992_m1    |
| <i>Ccl2</i>     | Macrophage Chemoattractant Protein 1                            | Mm00441242_m1    |
| <i>Ccl3</i>     | Macrophage Inflammatory Protein 1-alpha                         | Mm00441258_m1    |
| <i>Ccl4</i>     | Macrophage Inflammatory Protein 1-beta                          | Mm00443111_m1    |
| <i>Ccl5</i>     | Regulated upon activation, normal T cell expressed and secreted | Mm01302427_m1    |
| <i>Ccl11</i>    | Eotaxin, Scya11                                                 | Mm00441238_m1    |
| <i>Chi3l3</i>   | YM1 chitinase 3-like 3                                          | Mm00657889_mH    |
| <i>Chi3l4</i>   | YM2 chitinase 3-like 4                                          | Mm00840870_m1    |
| <i>Clca3</i>    | Chloride channel calcium activated 3                            | Mm00489959_m1    |
| <i>Crp</i>      | C-reactive protein                                              | Mm00432680_g1    |
| <i>Cxcl1</i>    | Keratinocyte Chemoattractant                                    | Mm00433859_m1    |
| <i>Cxcl2</i>    | Macrophage Inflammatory Protein-2                               | Mm00436450_m1    |
| <i>Cyp2e1</i>   | Cytochrome P450                                                 | Mm00491127_m1    |
| <i>Egfr</i>     | Epidermal growth factor receptor                                | Mm00433023_m1    |
| <i>F2r</i>      | Coagulation factor II (thrombin) receptor                       | Mm00438851_m1    |
| <i>fgf9</i>     | Fibroblast growth factor 9                                      | Mm00442795_m1    |
| <i>fgf10</i>    | Fibroblast growth factor 10                                     | Mm00433275_m1    |
| <i>fgf18</i>    | Fibroblast growth factor 18                                     | Mm00433286_m1    |
| <i>Foxa1</i>    | Forkhead box A1                                                 | Mm00484713_m1    |
| <i>Foxa2</i>    | Forkhead box A2                                                 | Mm00839704_mH    |
| <i>Foxp3</i>    | Forkhead box P3                                                 | Mm00475165_m1    |
| <i>Gata3</i>    | GATA binding protein 3                                          | Mm00484683_m1    |
| <i>Gclc</i>     | Glutamate-cysteine ligase, catalytic subunit                    | Mm00802655_m1    |
| <i>Gclm</i>     | Glutamate-cysteine ligase, modifier subunit                     | Mm00514996_m1    |
| <i>Gstk1</i>    | Glutathione S-transferase kappa 1                               | Mm00504022_m1    |
| <i>Gstm1</i>    | Glutathione S-transferase, mu 1                                 | Mm00833915_g1    |
| <i>Gstp1</i>    | Glutathione S-transferase, pi 1                                 | Mm00496606_m1    |
| <i>Hmox</i>     | Heme oxygenase (decycling) 1                                    | Mm00516004_m1    |
| <i>ifng</i>     | Interferon gamma                                                | Mm00801778_m1    |
| <i>IL1b</i>     | Interleukin 1 beta                                              | Mm00434228_m1    |
| <i>IL2</i>      | Interleukin 2                                                   | Mm00434256_m1    |
| <i>IL4</i>      | Interleukin 4                                                   | Mm00445259_m1    |
| <i>IL5</i>      | Interleukin 5                                                   | Mm00439646_m1    |
| <i>IL6</i>      | Interleukin 6                                                   | Mm00446190_m1    |
| <i>IL10</i>     | Interleukin 10                                                  | Mm00439616_m1    |
| <i>IL-13</i>    | Interleukin 13                                                  | Mm00434204_m1    |
| <i>IL23a</i>    | Interleukin 23, alpha subunit p19                               | Mm00518984_m1    |
| <i>Mt1</i>      | Metallothionein 1                                               | Mm00496660_g1    |
| <i>Muc5ac</i>   | Mucin 5, subtypes A & C                                         | Mm01276725_g1    |
| <i>Nfe2l2</i>   | Nuclear factor, erythroid derived 2, like 2                     | Mm00477784_m1    |
| <i>Nos2</i>     | Nitric oxide synthase 2                                         | Mm00440485_m1    |
| <i>Nqo1</i>     | NAD(P)H dehydrogenase, quinone 1                                | Mm00500821_m1    |
| <i>Pcna</i>     | Proliferating cell nuclear antigen                              | Mm00448100_g1    |
| <i>Pparg</i>    | Peroxisome proliferator activated receptor gamma                | Mm00440945_m1    |
| <i>Ptgs2</i>    | Prostaglandin-endoperoxide synthase 2                           | Mm00478374_m1    |
| <i>Saa3</i>     | Serum amyloid A3                                                | Mm00441203_m1    |
| <i>Scgb1a1</i>  | Clara cell secretory protein                                    | Mm00442046_m1    |
| <i>Serpine1</i> | Serine (or cysteine) peptidase inhibitor, clade E, member 1     | Mm01204469_m1    |
| <i>Sftpc</i>    | Surfactant associated protein C                                 | Mm00488144_m1    |
| <i>Sftpd</i>    | Surfactant associated protein D                                 | Mm00486060_m1    |
| <i>Socs3</i>    | Suppressor of cytokine signaling 3                              | Mm00545913_s1    |
| <i>Sod1</i>     | Superoxide dismutase 1, soluble                                 | Mm01344233_g1    |
| <i>Sod2</i>     | Superoxide dismutase 2, mitochondrial                           | Mm00449726_m1    |
| <i>Stat6</i>    | Signal transducer and activator of transcription 6              | Mm01160477_m1    |
| <i>Tfpi2</i>    | Tissue factor pathway inhibitor 2                               | Mm00436948_m1    |
| <i>Tgfb1</i>    | Transforming growth factor, beta 1                              | Mm01178820_m1    |
| <i>Tnfa</i>     | Tumor necrosis factor(TNF superfamily, member 2)                | Mm00443258_m1    |
| <i>Vegfa</i>    | Vascular endothelial growth factor A                            | Mm01281447_m1    |
