# Supplementary material
Source: PubMed Central journal article supplement (PMC2822559)
Supplement: 00252.2009_3.pdf [file 00252.2009_3.pdf]

Supplemental Table #2 Gene Expression Changes

| Gene           | Control       |                  |                | HIF1 $\alpha$ $\Delta/\Delta$ |                |                |
|----------------|---------------|------------------|----------------|-------------------------------|----------------|----------------|
|                | Saline        | 30 $\mu$ g       | 60 $\mu$ g     | Saline                        | 30 $\mu$ g     | 60 $\mu$ g     |
| 18S            | 1.00 +/- 0.04 | 1.04 +/- 0.03    | 1.06 +/- 0.04  | 1.15 +/- 0.05                 | 1.07 +/- 0.02  | 1.02 +/- 0.03  |
| $\beta$ -Actin | 1.00 +/- 0.05 | -1.14 +/- 0.05   | -1.13 +/- 0.03 | -1.05 +/- 0.02                | -1.08 +/- 0.04 | -1.06 +/- 0.02 |
| GAPDH          | 1.00 +/- 0.05 | 1.08 +/- 0.07    | 1.05 +/- 0.03  | -1.10 +/- 0.05                | -1.01 +/- 0.04 | 1.02 +/- 0.02  |
| MCP            | 1.00 +/- 0.35 | 1.70 +/- 0.96    | 1.18 +/- 0.48  | 2.38 +/- 1.03                 | 1.10 +/- 0.27  | -1.62 +/- 0.40 |
| MIP1a          | 1.00 +/- 0.21 | 1.79 +/- 0.46    | 2.40 +/- 0.62  | 2.39 +/- 0.56                 | 2.19 +/- 1.83  | 2.43 +/- 0.34  |
| Eotaxin        | 1.00 +/- 0.08 | 1.42 +/- 0.23    | 1.15 +/- 0.15  | 1.88 +/- 0.23                 | 1.49 +/- 0.10  | 2.52 +/- 0.36  |
| Ym1            | 1.00 +/- 0.25 | 1.21 +/- 0.36    | 1.88 +/- 0.51  | 1.56 +/- 0.62                 | 3.00 +/- 0.42  | 3.38 +/- 0.41  |
| Ym2            | 1.00 +/- 0.80 | -5.88 +/- 3.99   | -3.36 +/- 1.82 | -4.46 +/- 2.58                | 2.04 +/- 1.63  | 2.82 +/- 0.63  |
| GOB5           | 1.00 +/- 0.60 | -34.02 +/- 16.99 | -6.91 +/- 2.93 | -2.30 +/- 1.54                | 2.19 +/- 1.83  | 2.03 +/- 0.75  |
| KC             | 1.00 +/- 0.45 | 2.82 +/- 1.73    | -1.11 +/- 0.17 | 2.92 +/- 1.03                 | 2.21 +/- 1.02  | 1.40 +/- 0.26  |
| HmOx           | 1.00 +/- 0.19 | 1.88 +/- 0.48    | 2.72 +/- 0.34  | 1.02 +/- 0.09                 | 2.87 +/- 0.54  | 2.08 +/- 0.16  |
| IFN $\gamma$   | 1.00 +/- 0.48 | 1.55 +/- 0.82    | 3.37 +/- 2.32  | -1.90 +/- 0.41                | -1.51 +/- 0.40 | -2.34 +/- 0.29 |
| IL1 $\beta$    | 1.00 +/- 0.43 | 1.30 +/- 0.32    | -2.50 +/- 0.41 | 1.24 +/- 0.30                 | -1.16 +/- 0.22 | -1.69 +/- 0.62 |
| IL4            | 1.00 +/- 0.22 | -1.03 +/- 0.14   | 1.31 +/- 0.17  | 1.05 +/- 0.28                 | 1.34 +/- 0.40  | 1.27 +/- 0.24  |
| IL5            | 1.00 +/- 0.19 | 1.60 +/- 0.67    | 1.09 +/- 0.46  | 8.44 +/- 3.02                 | 3.71 +/- 1.36  | 2.02 +/- 0.23  |
| IL6            | 1.00 +/- 0.48 | 2.43 +/- 1.22    | 1.29 +/- 0.19  | 1.93 +/- 0.37                 | 1.86 +/- 0.31  | 2.13 +/- 0.50  |
| IL10           | 1.00 +/- 0.67 | 1.11 +/- 0.51    | 1.89 +/- 1.23  | -2.65 +/- 0.47                | -1.46 +/- 0.50 | -1.26 +/- 0.32 |
| IL13           | 1.00 +/- 0.41 | -1.73 +/- 0.22   | -1.18 +/- 0.37 | 1.34 +/- 0.34                 | 1.40 +/- 0.44  | 2.46 +/- 0.51  |
| MUC5ac         | 1.00 +/- 0.24 | 1.87 +/- 0.39    | 3.08 +/- 0.50  | 1.56 +/- 0.27                 | 1.98 +/- 0.23  | 3.36 +/- 0.41  |
| iNOS           | 1.00 +/- 0.14 | 1.91 +/- 0.72    | 2.59 +/- 1.49  | -1.23 +/- 0.22                | -1.01 +/- 0.18 | 1.15 +/- 0.12  |
| SAA3           | 1.00 +/- 0.73 | 1.46 +/- 0.69    | 3.47 +/- 2.13  | -1.18 +/- 0.17                | -1.17 +/- 0.41 | 1.09 +/- 0.58  |
| SPC            | 1.00 +/- 0.22 | -1.10 +/- 0.23   | 1.40 +/- 0.29  | -1.01 +/- 0.22                | 1.72 +/- 0.19  | 1.48 +/- 0.05  |
| TNF $\alpha$   | 1.00 +/- 0.17 | 1.48 +/- 0.28    | 2.11 +/- 0.70  | 1.21 +/- 0.11                 | 1.07 +/- 0.17  | 1.02 +/- 0.13  |
| VEGF           | 1.00 +/- 0.08 | -1.10 +/- 0.12   | -1.47 +/- 0.24 | 1.13 +/- 0.13                 | -1.31 +/- 0.05 | -1.51 +/- 0.14 |
