# Supplementary material
Source: PubMed Central journal article supplement (PMC2822559)

## Supplemental Data: Figure #1

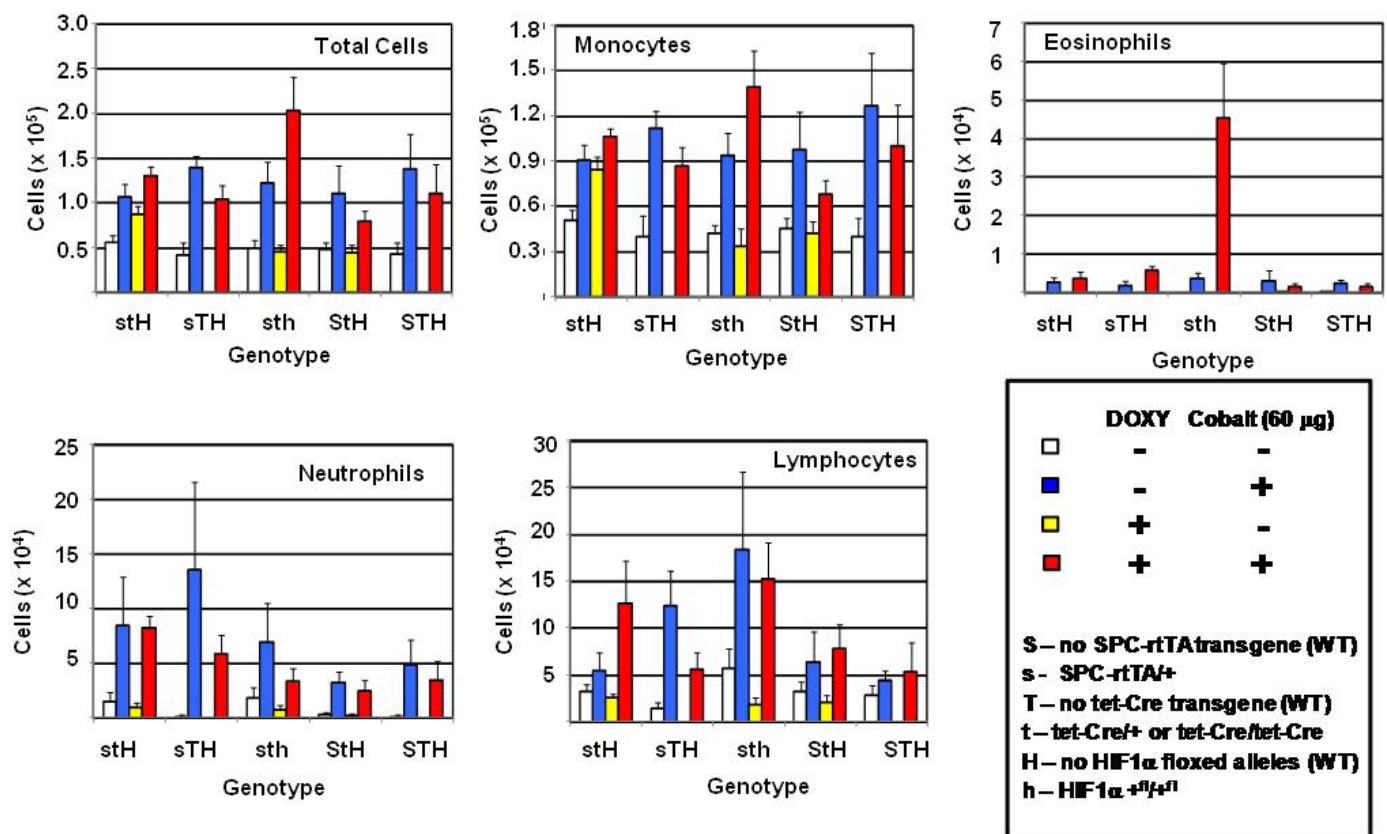

Supplement: 00252.2009_1.pdf [file 00252.2009_1.pdf]
